# Supplementary material
Source: PubMed Central journal article supplement (PMC3645507)
Supplement: 1218821110_pnas.201218821SI.pdf [file 1218821110_pnas.201218821SI.pdf]

# Supporting Information

Bush et al. 10.1073/pnas.1218821110

**Table S1. Disciplinary distribution at each institution type**

| Institution type         | <i>N</i> | %    |
|--------------------------|----------|------|
| <b>PhD granting</b>      |          |      |
| Biology                  | 67       | 46.5 |
| Chemistry                | 33       | 22.9 |
| Geoscience               | 11       | 7.6  |
| Physics                  | 19       | 13.2 |
| Other                    | 14       | 9.7  |
| Total                    | 144      | 100  |
| <b>MS granting</b>       |          |      |
| Biology                  | 19       | 30.6 |
| Chemistry                | 19       | 30.6 |
| Geoscience               | 5        | 8.1  |
| Physics                  | 12       | 19.4 |
| Other                    | 7        | 11.3 |
| Total                    | 62       | 100  |
| <b>PUI</b>               |          |      |
| Biology                  | 22       | 34.4 |
| Chemistry                | 15       | 23.4 |
| Geoscience               | 7        | 10.9 |
| Physics                  | 9        | 14.1 |
| Other                    | 11       | 17.2 |
| Total                    | 64       | 100  |
| <b>Community college</b> |          |      |
| Biology                  | 1        | 14.3 |
| Chemistry                | 2        | 28.6 |
| Geoscience               | 1        | 14.3 |
| Physics                  | 1        | 14.3 |
| Other                    | 2        | 28.6 |
| Total                    | 7        | 100  |
| <b>Other</b>             |          |      |
| Biology                  | 5        | 83.3 |
| Chemistry                | 0        | 0.0  |
| Geoscience               | 0        | 0.0  |
| Physics                  | 0        | 0.0  |
| Other                    | 1        | 16.7 |
| Total                    | 6        | 100  |

See *SI Appendix* for details.

**Table S2. SFES at each type of institution who say they spend less, more, or about the same amount of their time for teaching activities or for scholarly activities as non-SFES colleagues in their department**

| Activities                  | PUI, % (no.) | MS, % (no.) | PhD, % (no.) | Total no. |
|-----------------------------|--------------|-------------|--------------|-----------|
| <b>Teaching activities</b>  |              |             |              |           |
| Less                        | 15.2 (10)    | 12.5 (8)    | 8.5 (12)     |           |
| Same                        | 66.7 (44)    | 70.3 (45)   | 36.2 (51)    |           |
| More                        | 18.2 (12)    | 17.2 (11)   | 55.3 (78)    |           |
| Total                       | 100 (66)     | 100 (64)    | 100 (141)    | 271       |
| <b>Scholarly activities</b> |              |             |              |           |
| Less                        | 22.7 (15)    | 24.2 (15)   | 48.2 (68)    |           |
| Same                        | 56.1 (37)    | 46.8 (29)   | 40.4 (57)    |           |
| More                        | 21.2 (14)    | 29.0 (18)   | 11.3 (16)    |           |
| Total                       | 100 (66)     | 100 (62)    | 100 (141)    | 269       |

See *SI Appendix* for details.

**Table S3. SFES at each type of institution who transitioned to or were hired as faculty who specifically specialize in science education beyond typical teaching duties**

| Faculty      | PUI, % (no.) | MS, % (no.) | PhD, % (no.) | Total no. |
|--------------|--------------|-------------|--------------|-----------|
| Transitioned | 59.6 (34)    | 31.4 (16)   | 33.9 (42)    |           |
| Hired        | 40.4 (23)    | 68.6 (35)   | 66.1 (82)    |           |
| Total        | 100 (57)     | 100 (51)    | 100 (124)    | 232       |

"Not sure" responses were excluded from analysis. See [SI Appendix](#) for details.

**Table S4. SFES survey responses from each institution type at each rank**

| Rank                | PUI, % (no.) | MS, % (no.) | PhD, % (no.) | Total no. |
|---------------------|--------------|-------------|--------------|-----------|
| Instructor/lecturer | 7.6 (5)      | 3.2 (2)     | 14.0 (20)    |           |
| Assistant           | 18.2 (12)    | 17.5 (11)   | 19.6 (28)    |           |
| Associate           | 33.3 (22)    | 33.3 (21)   | 32.9 (47)    |           |
| Full                | 34.9 (23)    | 41.3 (26)   | 17.5 (25)    |           |
| Other               | 6.1 (4)      | 4.8 (3)     | 16.1 (23)    |           |
| Total               | 100 (66)     | 100 (63)    | 100 (143)    | 272       |

See [SI Appendix](#) for details.

**Table S5. SFES at each type of institution who are not tenure track versus tenure track**

| Status           | PUI, % (no.) | MS, % (no.) | PhD, % (no.) | Total no. |
|------------------|--------------|-------------|--------------|-----------|
| Not tenure track | 22.7 (15)    | 9.4 (6)     | 38.6 (56)    |           |
| Tenure track     | 77.3 (51)    | 90.6 (58)   | 61.4 (89)    |           |
| Total            | 100 (66)     | 100 (64)    | 100 (145)    | 275       |

**Table S6. SFES at each type of institution who sought funding for science education research**

| Funding sought                  | PUI, % (no.) | MS, % (no.) | PhD, % (no.) |
|---------------------------------|--------------|-------------|--------------|
| K–12 science education          | 36.4 (24)    | 56.3 (36)   | 38.6 (56)    |
| Undergraduate science education | 53.0 (35)    | 56.3 (36)   | 69.0 (100)   |
| Science education research      | 59.1 (39)    | 81.3 (52)   | 84.1 (122)   |
| Total                           | 100 (64)     | 100 (64)    | 100 (145)    |

See [SI Appendix](#) for details.

**Table S7. Successfully funded SFES with and without formal science education training at each type of institution**

| Formal science education training | Total, % (no.) | PUI, % (no.) | MS, % (no.) | PhD, % (no.) |
|-----------------------------------|----------------|--------------|-------------|--------------|
| Yes                               | 68.7 (68)      | 62.5 (10)    | 62.9 (22)   | 75 (36)      |
| No                                | 63.9 (85)      | 48.5 (16)    | 69.6 (16)   | 68.8 (53)    |

See [SI Appendix](#) for details.

**Table S8. Logistical regression analysis of 261 SFES regarding funding success in science education by IBM SPSS statistics (version 20)**

| Variable                              | $\beta$ | SE $\beta$ | Wald $\chi^2$ | df | P       | Exp( $\beta$ ) |
|---------------------------------------|---------|------------|---------------|----|---------|----------------|
| Constant                              | -4.002  | 0.754      | 28.200        | 1  | < 0.001 | 0.018          |
| Tenure track                          | 0.843   | 0.354      | 5.685         | 1  | 0.017   | 2.323          |
| Field*                                |         |            | 2.857         | 4  | 0.582   |                |
| Chemistry                             | 0.320   | 0.371      | 0.743         | 1  | 0.389   | 1.377          |
| Geoscience                            | 0.604   | 0.546      | 1.223         | 1  | 0.269   | 1.829          |
| Other                                 | 0.301   | 0.509      | 0.349         | 1  | 0.554   | 1.351          |
| Physics                               | 0.663   | 0.451      | 2.156         | 1  | 0.142   | 1.940          |
| Institution <sup>†</sup>              |         |            | 9.773         | 2  | 0.008   |                |
| MS                                    | 0.351   | 0.417      | 0.709         | 1  | 0.400   | 1.420          |
| PhD                                   | 1.117   | 0.373      | 8.942         | 1  | 0.003   | 3.054          |
| Applied for science education funding | 2.776   | 0.636      | 19.035        | 1  | < 0.001 | 16.054         |
| Basic science research funding        | 0.921   | 0.402      | 5.238         | 1  | 0.022   | 2.511          |
| Formal training in science education  | 0.324   | 0.315      | 1.064         | 1  | 0.302   | 1.383          |
| Test                                  |         |            |               |    |         |                |
| Overall model evaluation              |         |            |               |    |         |                |
| Omnibus tests of model coefficients   |         |            | 68.157        | 10 | < 0.001 |                |
| Goodness-of-fit test                  |         |            |               |    |         |                |
| Hosmer and Lemeshow                   |         |            | 7.871         | 8  | 0.446   |                |

\*Biology is the reference category for Field.

<sup>†</sup>PUI is the reference category for institution type. -2 Log likelihood = 286.54, Cox and Snell.  $R^2 = 0.230$ , Nagelkerke  $R^2 = 0.309$ . See [SI Appendix](#) for details.

**Table S9. Observed and predicted frequencies for funding success in science education by logistic regression with the cutoff of 0.50**

| Observed          | Predicted |     | % Correct |
|-------------------|-----------|-----|-----------|
|                   | Yes       | No  |           |
| Yes               | 58        | 51  | 53.2      |
| No                | 21        | 131 | 86.2      |
| Overall % correct |           |     | 72.4      |

See [SI Appendix](#) for details.

## Other Supporting Information Files

[SI Appendix \(PDF\)](#)
